# Supplementary material for: Self-touch: Contact durations and point of touch of spontaneous facial self-touches differ depending on cognitive and emotional load
Source: PubMed Central journal article supplement (PMC6413902; doi:10.1371/journal.pone.0213677), 2019-03-12
Supplement: pone.0213677.s001.pdf [file pone.0213677.s001.pdf]

**Table S1. Within-subjects comparisons of movement times and contact duration during RI**

| temporal aspects |                  | <i>M</i> | <i>N</i> | <i>SD</i> | <i>t</i> | <i>df</i> | <i>p</i> |
|------------------|------------------|----------|----------|-----------|----------|-----------|----------|
| Pair 1           | T1 right hand    | .944     | 23       | .300      | .588     | 22        | .563     |
|                  | T1 left hand     | .909     | 23       | .229      |          |           |          |
| Pair 2           | T2 right contact | 1.938    | 23       | 1.376     | .222     | 22        | .826     |
|                  | T2 left contact  | 1.832    | 23       | 1.722     |          |           |          |
| Pair 3           | T3 right hand    | .983     | 23       | .247      | -.980    | 22        | .338     |
|                  | T3 left hand     | 1.326    | 23       | 1.668     |          |           |          |

T1 = movement time towards face; T2 = sFST skin contact duration; T3 = movement time away from face; Paired-samples t-tests of movement times and contact durations for left- and right-handed sFST indicated no significant differences.
