# Supplementary material for: Self-touch: Contact durations and point of touch of spontaneous facial self-touches differ depending on cognitive and emotional load
Source: PubMed Central journal article supplement (PMC6413902; doi:10.1371/journal.pone.0213677), 2019-03-12
Supplement: pone.0213677.s002.pdf [file pone.0213677.s002.pdf]

**Table S2. Within-subjects comparisons of movement times and contact duration *during reproduction***

| temporal aspects |               | <i>M</i> | <i>N</i> | <i>SD</i> | <i>t</i> | <i>df</i> | <i>p</i> |
|------------------|---------------|----------|----------|-----------|----------|-----------|----------|
| T1               | right hand    | .6044    | 6        | .18612    | -.800    | 5         | .460     |
|                  | left hand     | .7023    | 6        | .33855    |          |           |          |
| T2               | right contact | .8542    | 6        | .38802    | -1.555   | 5         | .181     |
|                  | left contact  | 1.2384   | 6        | .62103    |          |           |          |
| T3               | right hand    | .6059    | 6        | .11644    | -.987    | 5         | .369     |
|                  | left hand     | .8180    | 6        | .46650    |          |           |          |

T1 = movement time towards face; T2 = sFST skin contact duration; T3 = movement time away from face; Subjects who performed both left- and right-handed sFST during reproduction (n = 6) did not differ in the temporal aspects of their left- and right-handed sFST (paired-samples t-tests).
