# Supplementary material for: Self-touch: Contact durations and point of touch of spontaneous facial self-touches differ depending on cognitive and emotional load
Source: PubMed Central journal article supplement (PMC6413902; doi:10.1371/journal.pone.0213677), 2019-03-12
Supplement: pone.0213677.s003.pdf [file pone.0213677.s003.pdf]

**S3 Table. Paired samples t-Tests of all possible hand-face area combinations of sFST.**

|        |           | <i>M</i> | <i>N</i> | <i>SD</i> | <i>t</i> | <i>df</i> | <i>p</i> |
|--------|-----------|----------|----------|-----------|----------|-----------|----------|
| Pair 1 | T1_R_ipsi | .916     | 13       | .309      | .836     | 12        | .419     |
|        | T1_R_con  | .856     | 13       | .301      |          |           |          |
|        | T2_R_ipsi | 1.476    | 13       | .817      | 1.413    | 12        | .183     |
|        | T2_R_con  | 1.119    | 13       | .541      |          |           |          |
|        | T3_R_ipsi | .920     | 13       | .247      | 1.522    | 12        | .154     |
|        | T3_R_con  | .851     | 13       | .206      |          |           |          |
| Pair 2 | T1_L_ipsi | .949     | 12       | .210      | 1.210    | 11        | .252     |
|        | T1_L_con  | .837     | 12       | .205      |          |           |          |
|        | T2_L_ipsi | 1.306    | 12       | .694      | -1.185   | 11        | .261     |
|        | T2_L_con  | 1.537    | 12       | .674      |          |           |          |
|        | T3_L_ipsi | .980     | 12       | .379      | .580     | 11        | .573     |
|        | T3_L_con  | .889     | 12       | .258      |          |           |          |
| Pair 3 | T1_R_con  | .934     | 9        | .347      | .563     | 8         | .589     |
|        | T1_L_con  | .853     | 9        | .214      |          |           |          |
|        | T2_R_con  | 1.524    | 9        | 1.067     | -.474    | 8         | .648     |
|        | T2_L_con  | 1.669    | 9        | .691      |          |           |          |
|        | T3_R_con  | 1.055    | 9        | .194      | 1.685    | 8         | .131     |
|        | T3_L_con  | .893     | 9        | .234      |          |           |          |
| Pair 4 | T1_R_ipsi | .872     | 18       | .248      | -1.161   | 17        | .262     |
|        | T1_L_ipsi | .950     | 18       | .221      |          |           |          |
|        | T2_R_ipsi | 1.517    | 18       | 1.381     | -.284    | 17        | .780     |
|        | T2_L_ipsi | 1.620    | 18       | .988      |          |           |          |
|        | T3_R_ipsi | .876     | 18       | .241      | -1.775   | 17        | .094     |
|        | T3_L_ipsi | 1.051    | 18       | .338      |          |           |          |
| Pair 5 | T1_R_ipsi | .817     | 11       | .235      | -.746    | 10        | .473     |
|        | T1_L_con  | .913     | 11       | .311      |          |           |          |
|        | T2_R_ipsi | 1.140    | 11       | .397      | -.962    | 10        | .359     |
|        | T2_L_con  | 1.360    | 11       | .708      |          |           |          |
|        | T3_R_ipsi | .884     | 11       | .232      | -.450    | 10        | .662     |
|        | T3_L_con  | .922     | 11       | .290      |          |           |          |

|         |           |       |    |       |        |    |      |
|---------|-----------|-------|----|-------|--------|----|------|
| Pair 6  | T1_L_ipsi | .934  | 13 | .249  | -.363  | 12 | .723 |
|         | T1_R_con  | .976  | 13 | .413  |        |    |      |
|         | T2_L_ipsi | 1.607 | 13 | .900  | .532   | 12 | .604 |
|         | T2_R_con  | 1.417 | 13 | .893  |        |    |      |
|         | T3_L_ipsi | .980  | 13 | .403  | .007   | 12 | .995 |
|         | T3_R_con  | .979  | 13 | .232  |        |    |      |
| Pair 7  | T1_R_med  | .907  | 15 | .354  | -.024  | 14 | .981 |
|         | T1_L_med  | .911  | 15 | .425  |        |    |      |
|         | T2_R_med  | 1.783 | 15 | .980  | .481   | 14 | .638 |
|         | T2_L_med  | 1.603 | 15 | 1.037 |        |    |      |
|         | T3_R_med  | .908  | 15 | .343  | -.055  | 14 | .957 |
|         | T3_L_med  | .914  | 15 | .258  |        |    |      |
| Pair 8  | T1_R_med  | .860  | 17 | .326  | -.754  | 16 | .462 |
|         | T1_R_ipsi | .937  | 17 | .297  |        |    |      |
|         | T2_R_med  | 1.824 | 17 | 1.062 | .335   | 16 | .742 |
|         | T2_R_ipsi | 1.688 | 17 | 1.466 |        |    |      |
|         | T3_R_med  | .903  | 17 | .329  | .540   | 16 | .596 |
|         | T3_R_ipsi | .854  | 17 | .211  |        |    |      |
| Pair 9  | T1_R_med  | .818  | 16 | .263  | -1.449 | 15 | .168 |
|         | T1_R_con  | .984  | 16 | .403  |        |    |      |
|         | T2_R_med  | 1.956 | 16 | 1.024 | 1.547  | 15 | .143 |
|         | T2_R_con  | 1.360 | 16 | .910  |        |    |      |
|         | T3_R_med  | .835  | 16 | .198  | -1.005 | 15 | .331 |
|         | T3_R_con  | .918  | 16 | .217  |        |    |      |
| Pair 10 | T1_R_med  | .885  | 18 | .338  | -.093  | 17 | .927 |
|         | T1_L_ipsi | .893  | 18 | .177  |        |    |      |
|         | T2_R_med  | 1.839 | 18 | 1.001 | .655   | 17 | .521 |
|         | T2_L_ipsi | 1.638 | 18 | .859  |        |    |      |
|         | T3_R_med  | .980  | 18 | .402  | .243   | 17 | .811 |
|         | T3_L_ipsi | .952  | 18 | .344  |        |    |      |
| Pair 11 | T1_R_med  | .789  | 8  | .213  | -1.832 | 7  | .110 |
|         | T1_L_con  | .891  | 8  | .194  |        |    |      |

|         |           |       |    |       |       |    |      |
|---------|-----------|-------|----|-------|-------|----|------|
|         | T2_R_med  | 1.767 | 8  | 1.176 | .109  | 7  | .916 |
|         | T2_L_con  | 1.700 | 8  | .732  |       |    |      |
|         | T3_R_med  | .822  | 8  | .182  | -.426 | 7  | .683 |
|         | T3_L_con  | .853  | 8  | .214  |       |    |      |
| Pair 12 | T1_L_med  | .887  | 18 | .271  | -.453 | 17 | .656 |
|         | T1_R_ipsi | .921  | 18 | .325  |       |    |      |
|         | T2_L_med  | 1.774 | 18 | 1.946 | .338  | 17 | .739 |
|         | T2_R_ipsi | 1.590 | 18 | 1.447 |       |    |      |
|         | T3_L_med  | 1.416 | 18 | 1.878 | 1.344 | 17 | .197 |
|         | T3_R_ipsi | .838  | 18 | .213  |       |    |      |
| Pair 13 | T1_L_med  | .917  | 11 | .495  | .827  | 10 | .428 |
|         | T1_R_con  | .834  | 11 | .424  |       |    |      |
|         | T2_L_med  | 2.422 | 11 | 2.450 | 1.333 | 10 | .212 |
|         | T2_R_con  | 1.364 | 11 | .802  |       |    |      |
|         | T3_L_med  | 1.621 | 11 | 2.423 | .977  | 10 | .352 |
|         | T3_R_con  | .893  | 11 | .245  |       |    |      |
| Pair 14 | T1_L_med  | .866  | 20 | .405  | -.956 | 19 | .351 |
|         | T1_L_ipsi | .955  | 20 | .274  |       |    |      |
|         | T2_L_med  | 1.860 | 20 | 1.874 | -.106 | 19 | .917 |
|         | T2_L_ipsi | 1.913 | 20 | .968  |       |    |      |
|         | T3_L_med  | 1.356 | 20 | 1.796 | .554  | 19 | .586 |
|         | T3_L_ipsi | 1.138 | 20 | .366  |       |    |      |
| Pair 15 | T1_L_med  | .872  | 8  | .259  | -.158 | 7  | .879 |
|         | T1_L_con  | .897  | 8  | .240  |       |    |      |
|         | T2_L_med  | 1.641 | 8  | .606  | -.539 | 7  | .606 |
|         | T2_L_con  | 1.791 | 8  | .599  |       |    |      |
|         | T3_L_med  | .959  | 8  | .245  | .291  | 7  | .779 |
|         | T3_L_con  | .925  | 8  | .330  |       |    |      |

T1 = movement time towards face; T2 = contact duration; T3 = movement time away from face; R = right hand; L = left hand; ipsi = ipsilateral face area; con = contralateral face area; med = middle axis of the face. For each hand-face-area combination only those subjects were compared who performed both types of sFST. By way of example, the paired-samples t-test of Pair 1 only includes subjects who performed both ipsi- and contralateral sFST with their right hand (n = 13).
